# Supplementary material for: Effects of Anti-Fibrotic Drugs on Transcriptome of Peripheral Blood Mononuclear Cells in Idiopathic Pulmonary Fibrosis
Source: MDPI journal article supplement (doi:10.3390/ijms25073750), 2024-03-28
Supplement: s1 [file s1]

**Figure S1:** Details of Figure 1c.

**Figure S2:** Details of Figure 2c.

**Figure S3:** Comparison of gene expression levels before and after pirfenidone (PFD) administration using real-time quantitative PCR. (a) *CCNE1*, (b) *SERPINE1*. We performed qRT-PCR to confirm the potential effects of PFD on the transcriptome signature of PBMCs in patients with IPF. The qRT-PCR of *CCNE1* and *SERPINE1* showed a trend similar to the transcriptome signature, though not significant because there were only three specimens.

**Figure S4:** Details of Figure 3c.

**Figure S5:** Comparison of gene expression levels before and after nintedanib (NTD) administration using real-time qPCR. (a) *ACOT7*, (b) *CCNB2*, (c) *CDK1*, (d) *SERPINE1*. We performed qRT-PCR to confirm the potential effects of NTD on the transcriptome signature of PBMCs in patients with IPF. The qRT-PCR of *ACOT7*, *CCNB2*, *CDK1*, and *SERPINE1* showed a trend similar to the transcriptome signature, though not significant because there were only three specimens.

**Table S1:** Details of oral medication in the patients with IPF.

**Table S2:** Differential gene expression in PBMCs between idiopathic pulmonary fibrosis (IPF) and healthy controls (HCs).

**Table S3:** Enrichment analysis of transcriptome data. Gene Ontology (biological process): IPF vs. HCs.

**Table S4:** Enrichment analysis of transcriptome data. Gene Ontology (molecular function): IPF vs. HCs.

**Table S5:** Enrichment analysis of transcriptome data. Gene Ontology (cellular component): IPF vs. HCs.

**Table S6:** Differential gene expression in PBMCs between before and after PFD administration.

**Table S7:** Differences in transcriptome levels of molecules related to PFD acting mechanisms.

**Table S8:** Enrichment analysis of transcriptome data. Gene Ontology (biological process): before vs. after PFD administration.

**Table S9:** Enrichment analysis of transcriptome data. Gene Ontology (molecular function): before vs. after PFD administration.

**Table S10:** Enrichment analysis of transcriptome data. Gene Ontology (cellular component): before vs. after PFD administration.

**Table S11:** Differential gene expression in PBMCs between before and after NTD administration.

**Table S12:** Differences in transcriptome levels of molecules related to NTD acting mechanisms.

**Table S13:** Enrichment analysis of transcriptome data. Gene Ontology (biological process): before vs. after NTD administration.

**Table S14:** Enrichment analysis of transcriptome data. Gene Ontology (molecular function): before vs. after NTD administration.

**Table S15:** Enrichment analysis of transcriptome data. Gene Ontology (cellular component): before vs. after NTD administration.

**Table S16:** RPM data of the representative gene expression levels.
