# Supplementary figures and images for: Effects of Anti-Fibrotic Drugs on Transcriptome of Peripheral Blood Mononuclear Cells in Idiopathic Pulmonary Fibrosis
Source: MDPI journal article supplement (doi:10.3390/ijms25073750), 2024-03-28

Supplementary Figure S1

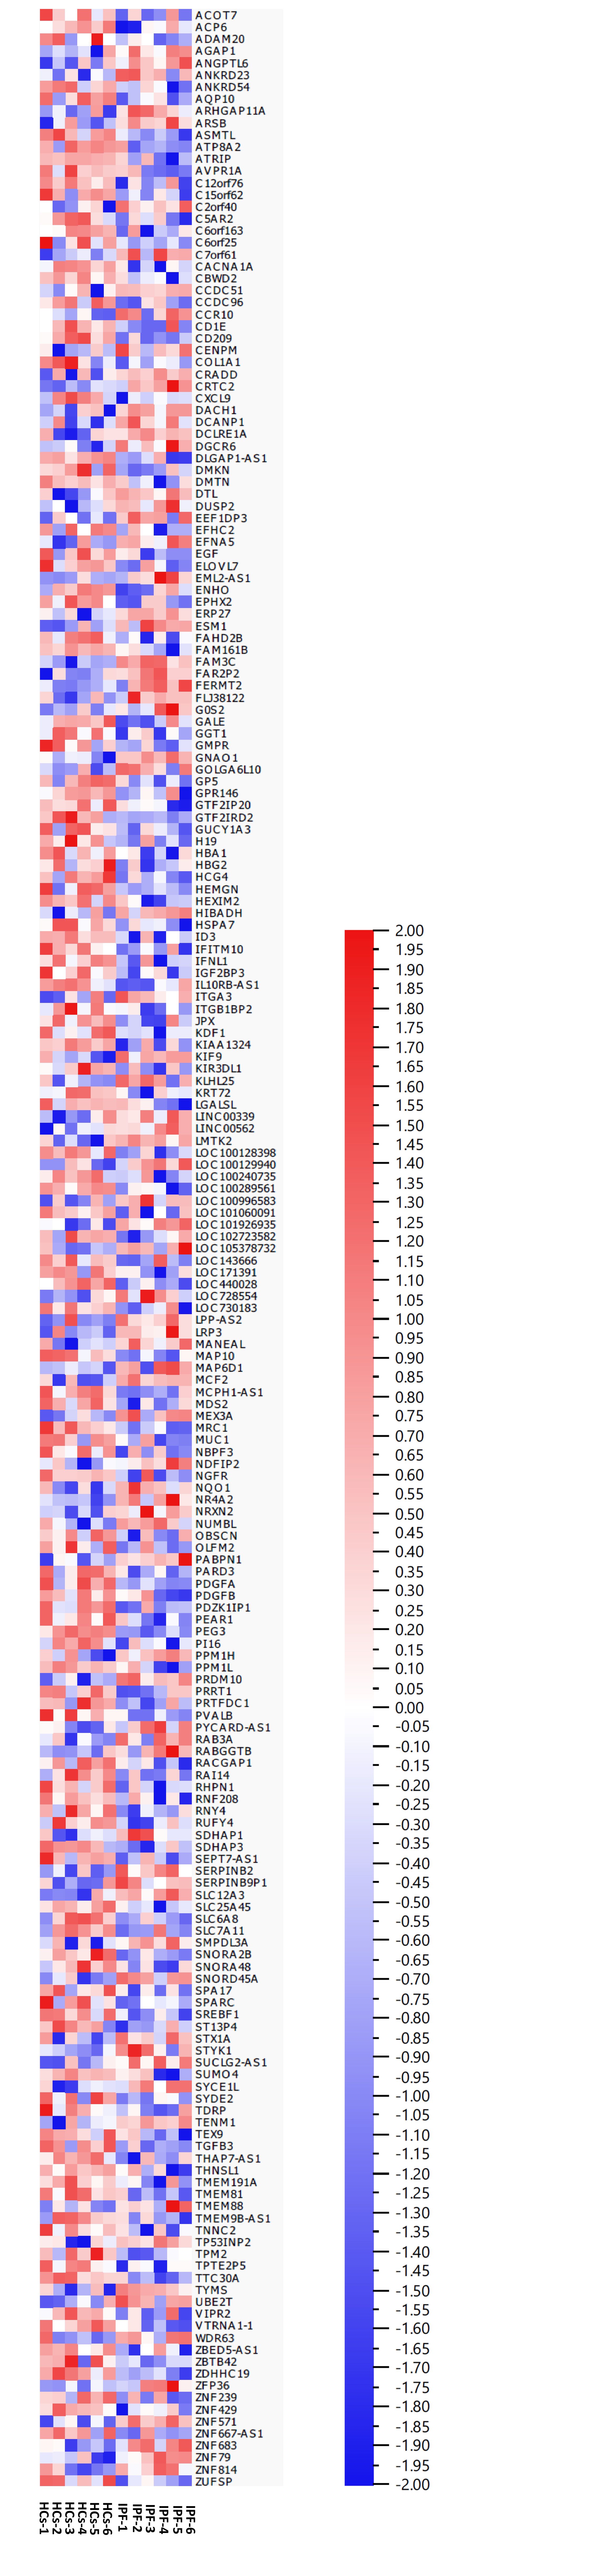

Supplement: s1 [file s1]

Supplementary Figure S3

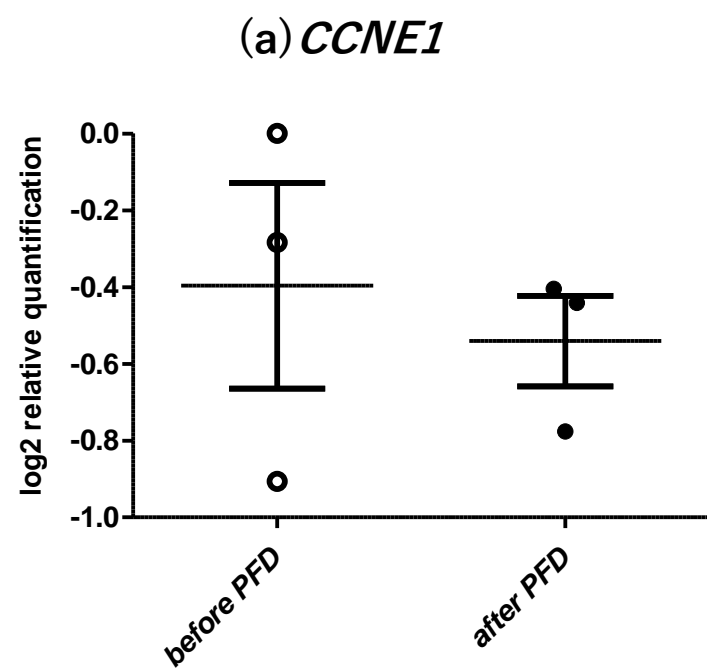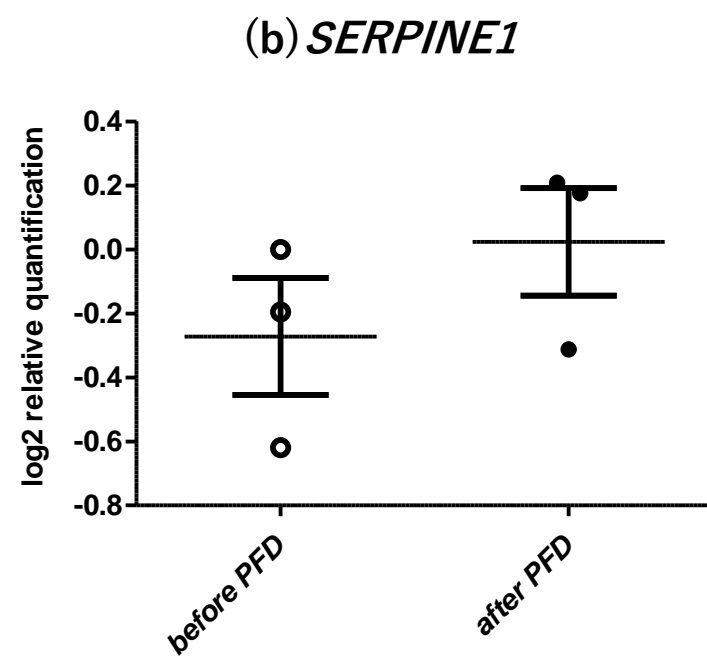

Supplement: s1 [file s1]

Supplementary Figure S3

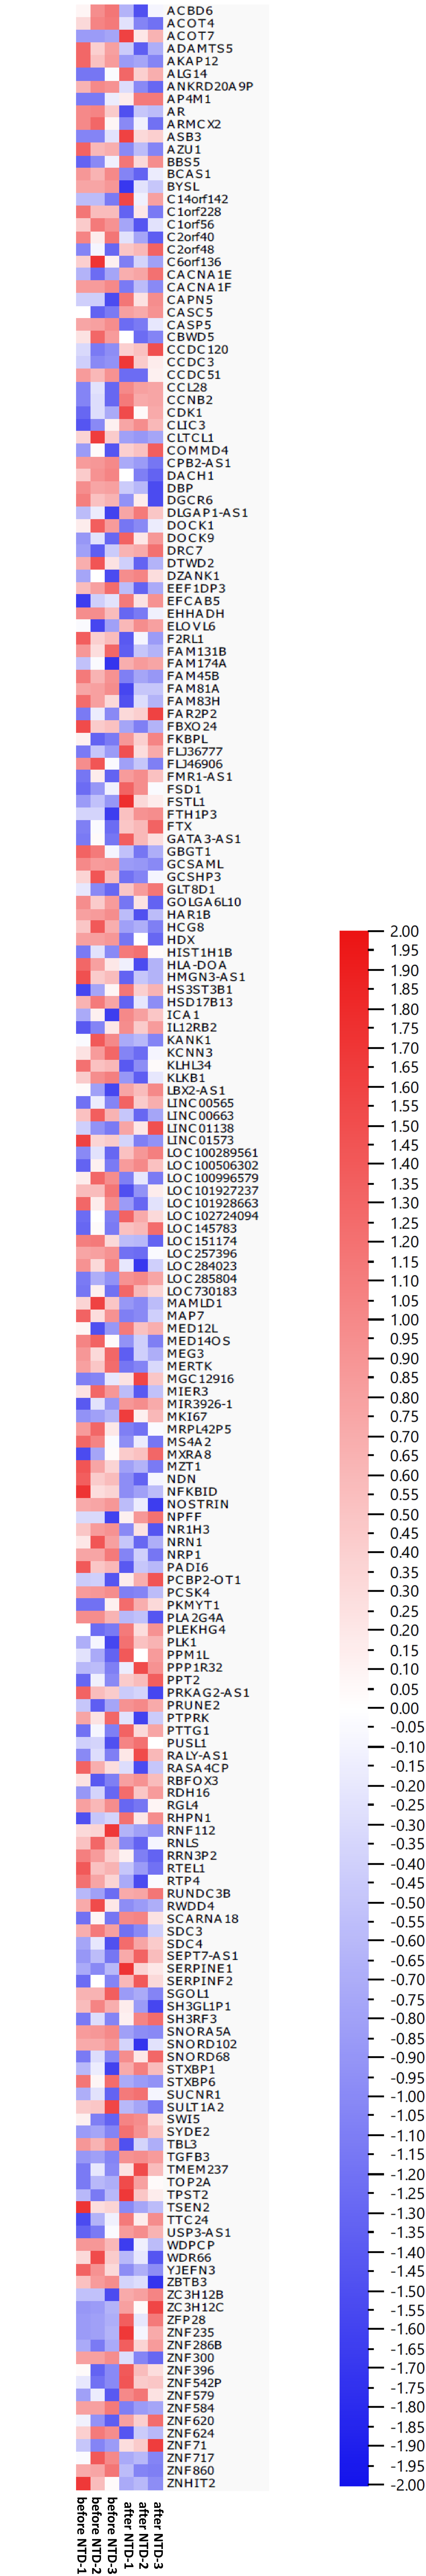

Supplement: s1 [file s1]

Supplementary Figure S5

(a) *ACOT7*

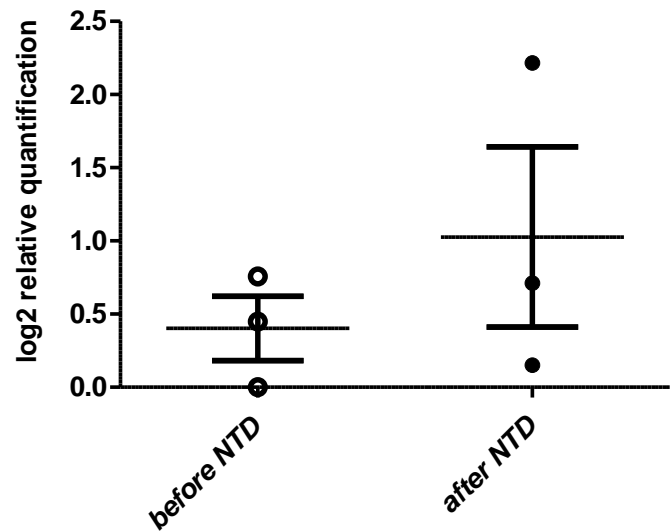

(b) *CCNB2*

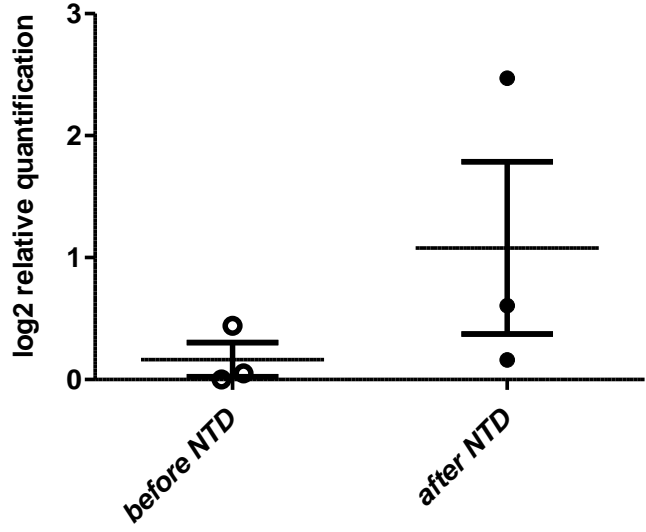

(c) *CDK1*

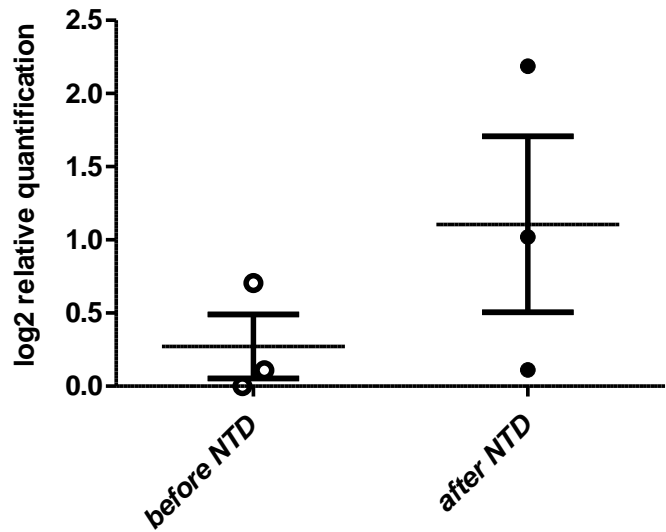

(d) *SERPINE1*

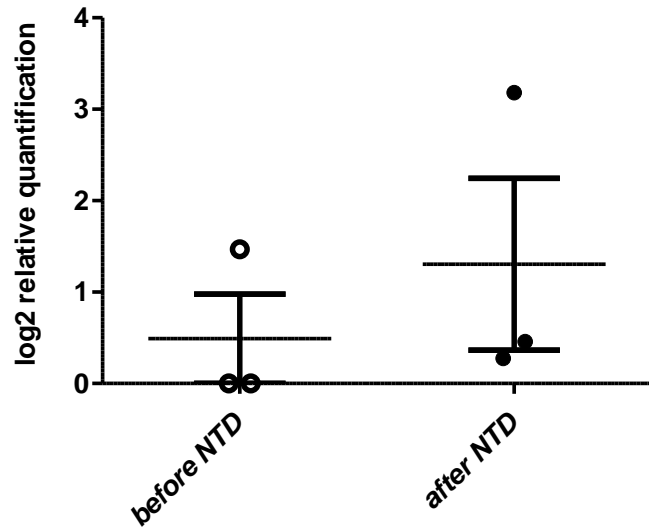

Supplement: s1 [file s1]

Supplementary Figure S2

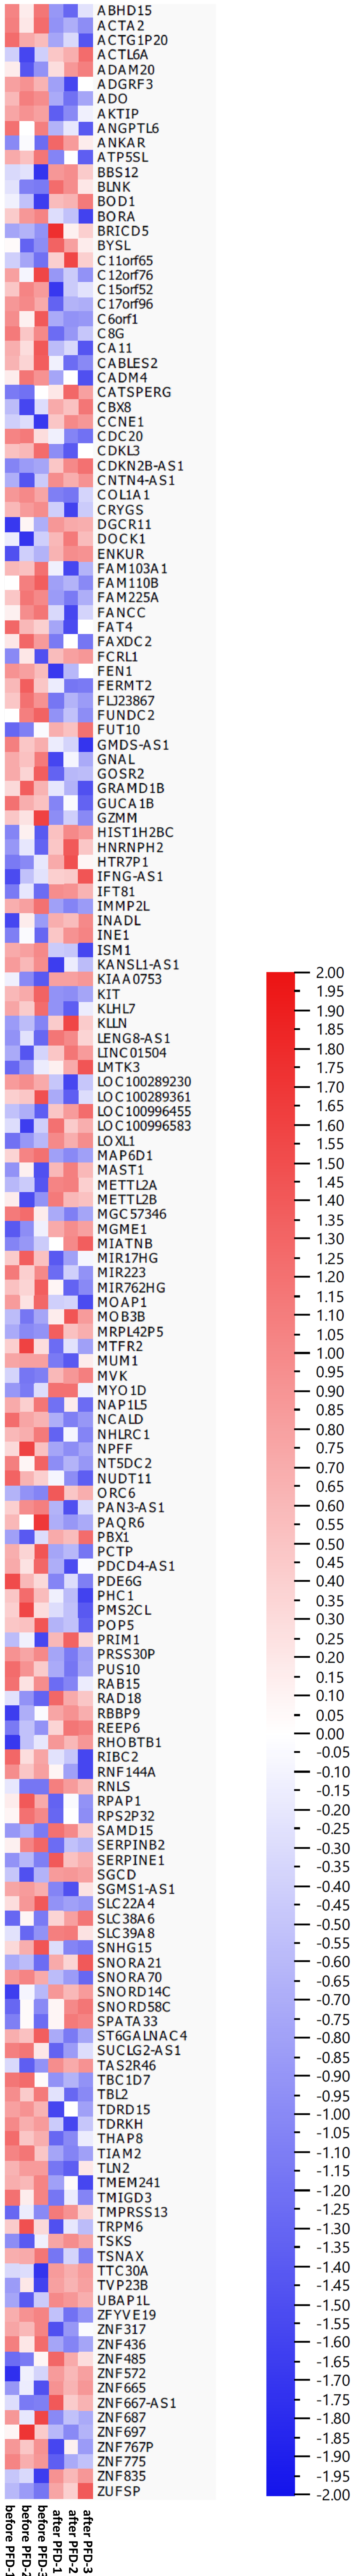

Supplement: s1 [file s1]
